# Supplementary material for: Mitochondrial unfolded protein response transcription factor ATFS-1 promotes longevity in a long-lived mitochondrial mutant through activation of stress response pathways
Source: BMC Biol. 2018 Dec 18;16:147. doi: 10.1186/s12915-018-0615-3 (PMC6298126; doi:10.1186/s12915-018-0615-3)
Supplement: Supplementary file 3 — Table S3. GO term enrichment for genes upregulated and downregulated in nuo-6 mutants and restored to wild-type in nuo-6;atfs-1 mutants. (XLSX 17 kb) [file 12915_2018_615_MOESM3_ESM.xlsx]

## Sheet: UP in nuo-6 not nuo-6;atfs-1
GOID: GO:0005581
Term: collagen trimer
Ontology: CC
Definition: A protein complex consisting of three collagen chains assembled into a left-handed tripl ehelix. The trimer typically assemble into higher order structures.
Genes:	WBGene00018643,	WBGene00008988,	WBGene00009431,	WBGene00016783,	WBGene00010659,	WBGene00021518,	WBGene00017726,	WBGene00021581,	WBGene00020455,	WBGene00016788,	WBGene00000752,	WBGene00015362,	WBGene00020799,	WBGene00001761,	WBGene00010128,	WBGene00020456,	WBGene00020658,	WBGene00003091,	WBGene00016218,	WBGene00018729,	WBGene00019373,	WBGene00001754,	WBGene00010851,	WBGene00015455
--------------------------------------
GOID: GO:0042302
Term: structural constituent of cuticle
Ontology: MF
Definition: The action of a molecule that contributes to the structural integrity of a cuticle.
Genes:	WBGene00000617,	WBGene00000675,	WBGene00000620,	WBGene00000677,	WBGene00000597,	WBGene00013489,	WBGene00000673,	WBGene00000693,	WBGene00000752,	WBGene00000715,	WBGene00006535,	WBGene00000713,	WBGene00000696,	WBGene00000608,	WBGene00000698,	WBGene00000609,	WBGene00000757,	WBGene00000751,	WBGene00000680,	WBGene00000656,	WBGene00000754,	WBGene00000671,	WBGene00000733,	WBGene00000668
--------------------------------------
GOID: GO:0006952
Term: defense response
Ontology: BP
Definition: Reactions, triggered in response to the presence of a foreign body or the occurrence of an injury, which results in resitrction of damage to the organism attacked or prevenetation/recovery from the infection caused by the attack.
Genes:	WBGene00000617,	WBGene00000675,	WBGene00000620,	WBGene00000677,	WBGene00000597,	WBGene00013489,	WBGene00000673,	WBGene00000693,	WBGene00000752,	WBGene00000708,	WBGene00000715,	WBGene00000713,	WBGene00000696,	WBGene00000608,	WBGene00000698,	WBGene00000609,	WBGene00000757,	WBGene00000751,	WBGene00000680,	WBGene00000656,	WBGene00000754,	WBGene00000671,	WBGene00000733,	WBGene00000668
--------------------------------------
GOID: GO:0045087
Term: innate immune response
Ontology: BP
Definition: Innate immune responses are defense response mediated by germline encoded components that directly recognize components of potential pathogens.
Genes:	WBGene00001792,	WBGene00018643,	WBGene00004932,	WBGene00008988,	WBGene00008296,	WBGene00009431,	WBGene00016783,	WBGene00007036,	WBGene00010659,	WBGene00021518,	WBGene00017726,	WBGene00021581,	WBGene00020455,	WBGene00000412,	WBGene00016788,	WBGene00000752,	WBGene00001692,	WBGene00020373,	WBGene00015362,	WBGene00020799,	WBGene00001761,	WBGene00000751,	WBGene00010128,	WBGene00013244,	WBGene00003765,	WBGene00020456,	WBGene00020658,	WBGene00003091,	WBGene00016218,	WBGene00018729,	WBGene00044719,	WBGene00019373,	WBGene00001754, WBGene00010851, WBGene00007547, WBGene00006930, WBGene00015455, WBGene00016204, WBGene00013091, WBGene00006959, WBGene00000668
--------------------------------------
GOID: GO:0006955
GO term enrichment for genes upregulated in nuo-6 mutants and restored to wild-type in nuo-6;atfs-1 mutants
Term: immune response
Ontology: BP
Definition: Any immune system process that functions in the calibrated response of an organism to a potential internal or invasive threat.
Genes:	WBGene00018643,	WBGene00008988,	WBGene00009431,	WBGene00016783,	WBGene00010659,	WBGene00021518,	WBGene00017726,	WBGene00021581,	WBGene00020455,	WBGene00016788,	WBGene00000752,	WBGene00001692,	WBGene00015362,	WBGene00020799,	WBGene00001761,	WBGene00000751,	WBGene00010128,	WBGene00003765,	WBGene00020456,	WBGene00020658,	WBGene00003091,	WBGene00016218,	WBGene00018729,	WBGene00044719,	WBGene00019373,	WBGene00001754,	WBGene00010851,	WBGene00006930,	WBGene00015455,	WBGene00000668
--------------------------------------
GOID: GO:0002376
Term: immune system process
Ontology: BP
Definition: Any process involved in the developmnet or functioning of the immune system, an organismal system for callibrated responses to potential internal or invasive threats.
Genes:	WBGene00018643,	WBGene00008988,	WBGene00009431,	WBGene00016783,	WBGene00010659,	WBGene00021518,	WBGene00017726,	WBGene00021581,	WBGene00020455,	WBGene00016788,	WBGene00000752,	WBGene00015362,	WBGene00020799,	WBGene00001761,	WBGene00010128,	WBGene00020456,	WBGene00020658,	WBGene00003091,	WBGene00016218,	WBGene00018729,	WBGene00019373,	WBGene00001754,	WBGene00010851,	WBGene00015455
--------------------------------------
GOID: GO:0005198
Term: structural molecule activity
Ontology: MF
Definition: The action of a molecule that contributes to the structural integrity of a complex or its assembly within or outside a cell.
Genes:	WBGene00000617,	WBGene00000675,	WBGene00000620,	WBGene00000677,	WBGene00000597,	WBGene00013489,	WBGene00000673,	WBGene00000693,	WBGene00000752,	WBGene00000715,	WBGene00000713,	WBGene00000696,	WBGene00000608,	WBGene00000698,	WBGene00000609,	WBGene00000757,	WBGene00000751,	WBGene00000680,	WBGene00000656,	WBGene00000754,	WBGene00000671,	WBGene00000733,	WBGene00000668
--------------------------------------
GOID: GO:0006950
Term: response to stress
Ontology: BP
Definition: Any process that results in a change in the state or activity of a cell or an organisms (in terms of movement, secretion, enzyme production, genes expression etc.) as a result of a disturbance in organismal or cellular homeostasis, usually, but not necessarily exogenous (e.g. temperature, humidity, ionizing radiation).
Genes:	WBGene00018643,	WBGene00008988,	WBGene00009431,	WBGene00016783,	WBGene00010659,	WBGene00021518,	WBGene00017726,	WBGene00021581,	WBGene00020455,	WBGene00016788,	WBGene00000752,	WBGene00015362,	WBGene00020799,	WBGene00001761,	WBGene00010128,	WBGene00020456,	WBGene00020658,	WBGene00003091,	WBGene00016218,	WBGene00018729,	WBGene00019373,	WBGene00001754,	WBGene00010851,	WBGene00015455
--------------------------------------
GOID: GO:0046914
Term: transition metal ion binding
Ontology: MF
Definition: Interacting selectively and non	Interacting selectively and non-covalently with a transition metal ions; a transition metal is an element whose atom has an incomplete d-subshell of extranuclear electrons, or which gives rise to a cation or cations with an incomplete d-subshell. Transition metals often have more than one valency state. Biologically relevant transition metals include vanadium, manganese, iron, copper, cobalt, nic…
Genes:	WBGene00019967,	WBGene00011673,	WBGene00018413,	WBGene00007036,	WBGene00018648,	WBGene00010215,	WBGene00003680,	WBGene00009595,	WBGene00006541,	WBGene00012449,	WBGene00003713,	WBGene00012446,	WBGene00015642,	WBGene00008588,	WBGene00010545,	WBGene00015705,	WBGene00016860,	WBGene00018594,	WBGene00015043,	WBGene00021611,	WBGene00017512,	WBGene00020658,	WBGene00003655,	WBGene00016197,	WBGene00003633,	WBGene00019001,	WBGene00007547,	WBGene00016283,	WBGene00003616,	WBGene00003694,	WBGene00021495,	WBGene00018346,	WBGene00000245
--------------------------------------

## Sheet: DOWN in nuo-6 not nuo-6;atfs-1
GO term enrichment for genes downregulated in nuo-6 mutants and restored to wild-type in nuo-6;atfs-1 mutants
GOID: GO:0042302
Term: structural constituent of cuticle
Ontology: MF
Definition: The action of a molecule that contributes	The action of a molecule that contributes to the structural integrity of a cuticle.
Genes:	WBGene00003057,	WBGene00000684,	WBGene00000655,	WBGene00005017,	WBGene00009983,	WBGene00005018,	WBGene00000626,	WBGene00000711,	WBGene00000649,	WBGene00000748,	WBGene00000663,	WBGene00000615,	WBGene00000746,	WBGene00000727,	WBGene00000647,	WBGene00000255,	WBGene00004394,	WBGene00000645,	WBGene00000653,	WBGene00001067,	WBGene00000694,	WBGene00000704,	WBGene00000685,	WBGene00004300
--------------------------------------
GOID: GO:0005581
Term: collagen trimer
Ontology: CC
Definition: A protein complex consisting of three col	A protein complex consisting of three collagen chains assembled into a left-handed triple helix. These trimers typically assemble into higher order structures.
Genes:	WBGene00015646,	WBGene00003057,	WBGene00003542,	WBGene00003533,	WBGene00006954,	WBGene00011235,	WBGene00009983,	WBGene00006952,	WBGene00003525,	WBGene00001691,	WBGene00005018,	WBGene00077697,	WBGene00003552,	WBGene00013352,	WBGene00020283,	WBGene00020571,	WBGene00020281,	WBGene00020646,	WBGene00001067,	WBGene00019184,	WBGene00003768,	WBGene00016164
--------------------------------------
GOID: GO:0005198
Term: structural molecule activity
Ontology: MF
Definition: The action of a molecule that contributes	The action of a molecule that contributes to the structural integrity of a complex or its assembly within or outside a cell.
Genes:	WBGene00003057,	WBGene00000684,	WBGene00000606,	WBGene00000655,	WBGene00005018,	WBGene00000626,	WBGene00000711,	WBGene00000649,	WBGene00000748,	WBGene00000663,	WBGene00000615,	WBGene00000746,	WBGene00000727,	WBGene00000647,	WBGene00000645,	WBGene00000653,	WBGene00001067,	WBGene00000694,	WBGene00000704,	WBGene00000685,	WBGene00000689
--------------------------------------
GOID: GO:0018996
Term: molting cycle, collagen and cuticulin-based cuticle
Ontology: BP
Definition: The periodic shedding of part or all of a	The periodic shedding of part or all of a collagen and cuticulin-based cuticle, which is then replaced by a new collagen and cuticulin-based cuticle. An example of this is found in the Nematode worm, Caenorhabditis elegans.
Genes:	WBGene00012683,	WBGene00003542,	WBGene00003533,	WBGene00006954,	WBGene00011235,	WBGene00006952,	WBGene00003525,	WBGene00001691,	WBGene00001690,	WBGene00003552,	WBGene00001984,	WBGene00020283,	WBGene00020281,	WBGene00000255,	WBGene00013926,	WBGene00020646,	WBGene00017881
--------------------------------------
GOID: GO:0042303
Term: molting cycle
Ontology: BP
Definition: The periodic casting off and regeneration	The periodic casting off and regeneration of an outer covering of cuticle, feathers, hair, horns, skin, etc.
Genes:	WBGene00015646,	WBGene00005017,	WBGene00019154,	WBGene00006952,	WBGene00001691,	WBGene00005018,	WBGene00021095,	WBGene00001690,	WBGene00004232,	WBGene00020554,	WBGene00003552,	WBGene00001984,	WBGene00009133,	WBGene00000255,	WBGene00011831,	WBGene00001067,	WBGene00004216,	WBGene00007999,	WBGene00004259
--------------------------------------
GOID: GO:0005576
Term: extracellular region
Ontology: CC
Definition: The space external to the outermost struc	The space external to the outermost structure of a cell. For cells without external protective or external encapsulating structures this refers to space outside of the plasma membrane. This term covers the host cell environment outside an intracellular parasite.
Genes:	WBGene00003057,	WBGene00011235,	WBGene00009983,	WBGene00005018,	WBGene00020646,	WBGene00001067,	WBGene00019184
--------------------------------------
GOID: GO:0044421
Term: extracellular region part
Ontology: CC
Definition: Any constituent part of the extracellular	Any constituent part of the extracellular region, the space external to the outermost structure of a cell. For cells without external protective or external encapsulating structures this refers to space outside of the plasma membrane. This term covers constituent parts of the host cell environment outside an intracellular parasite.
Genes:	WBGene00015646,	WBGene00000655,	WBGene00005017,	WBGene00019154,	WBGene00005018,	WBGene00001690,	WBGene00000255,	WBGene00004394,	WBGene00001067,	WBGene00022046
--------------------------------------
GOID: GO:0060102
Term: collagen and cuticulin-based cuticle extracellular matrix
Ontology: CC
Definition: A collagen and cuticulin-based noncellula	A collagen and cuticulin-based noncellular, multilayered structure that is synthesized by an underlying ectodermal (hypodermal) cell layer. The cuticle serves essential functions in body morphology, locomotion, and environmental protection. An example of this component is found in Caenorhabditis elegans.
Genes:	WBGene00003057,	WBGene00000684,	WBGene00000655,	WBGene00005017,	WBGene00009983,	WBGene00005018,	WBGene00000626,	WBGene00000711,	WBGene00000649,	WBGene00000748,	WBGene00000663,	WBGene00000615,	WBGene00000746,	WBGene00000727,	WBGene00000647,	WBGene00000255,	WBGene00004394,	WBGene00000645,	WBGene00000653,	WBGene00001067,	WBGene00000694,	WBGene00000704,	WBGene00000685,	WBGene00004300
--------------------------------------
GOID: GO:0040002
Term: collagen and cuticulin-based cuticle development
Ontology: BP
Definition: Synthesis and deposition of a collagen an	Synthesis and deposition of a collagen and cuticulin-based noncellular, hardened, or membranous secretion from an epithelial sheet. An example of this process is found in Caenorhabditis elegans.
Genes:	WBGene00015646,	WBGene00005017,	WBGene00019154,	WBGene00006952,	WBGene00001691,	WBGene00005018,	WBGene00021095,	WBGene00001690,	WBGene00004232,	WBGene00020554,	WBGene00003552,	WBGene00001984,	WBGene00009133,	WBGene00000255,	WBGene00011831,	WBGene00001067,	WBGene00004216,	WBGene00007999,	WBGene00004259
--------------------------------------
GOID: GO:0042335
Term: cuticle development
Ontology: BP
Definition: The chemical reactions and pathways resul	The chemical reactions and pathways resulting in the formation of a cuticle, the outer layer of some animals and plants, which acts to prevent water loss.
Genes:	WBGene00015646,	WBGene00000655,	WBGene00005017,	WBGene00019154,	WBGene00005018,	WBGene00001690,	WBGene00000255,	WBGene00004394,	WBGene00001067,	WBGene00022046
--------------------------------------
GOID: GO:0042338
Term: cuticle development involved in collagen and cuticle molting cycle
Ontology: BP
Definition: Synthesis and deposition of a collagen an	Synthesis and deposition of a collagen and cuticulin-based noncellular, hardened, or membranous secretion from an epithelial sheet, occurring as part of the molting cycle. An example of this process is found in Caenorhabditis elegans.
Genes:	WBGene00015646,	WBGene00005017,	WBGene00005018,	WBGene00000255,	WBGene00001067
--------------------------------------
GOID: GO:0008233
Term: peptidase activity
Ontology: MF
Definition: Catalysis of the hydrolysis of a peptide	Catalysis of the hydrolysis of a peptide bond. A peptide bond is a covalent bond formed when the carbon atom from the carboxyl group of one amino acid shares electrons with the nitrogen atom from the amino group of a second amino acid.
Genes:	WBGene00015646,	WBGene00003057,	WBGene00006954,	WBGene00011235,	WBGene00009983,	WBGene00006952,	WBGene00005018,	WBGene00077697,	WBGene00013352,	WBGene00020283,	WBGene00020281,	WBGene00020646,	WBGene00001067,	WBGene00019184,	WBGene00016164
--------------------------------------
GOID: GO:0031012
Term: extracellular matrix
Ontology: CC
Definition: A structure lying external to one or more	A structure lying external to one or more cells, which provides structural support for cells or tissues.
Genes:	WBGene00003057,	WBGene00011235,	WBGene00009983,	WBGene00005018,	WBGene00001067
--------------------------------------
